# Supplementary material for: Establishment of a conditional TALEN system using the translational enhancer dMac3 and an inducible promoter activated by glucocorticoid treatment to increase the frequency of targeted mutagenesis in plants
Source: PubMed Central journal article supplement (PMC6306166; doi:10.1371/journal.pone.0208959), 2018-12-26
Supplement: pone.0208959.s001.pdf [file pone.0208959.s001.pdf]

**Table A. Ratio of mutation in the transformant callus harboring pdxTALENs.**

| dMac3 | mutant<br>on 1 allele | mutant<br>on 2 alleles | WT  | Total |
|-------|-----------------------|------------------------|-----|-------|
| -     | 11<br>(6.6%)          | 28<br>(16.8%)          | 128 | 167   |
| +     | 34<br>(20.0%)         | 37<br>(21.8%)          | 99  | 170   |

**Table B. Ratio of mutation in the transformant callus harboring piProdxTALENs.**

| glucocorticoid | mutant<br>on 1 allele | mutant<br>on 2 alleles | WT | total |
|----------------|-----------------------|------------------------|----|-------|
| -              | 0                     | 0                      | 96 | 96    |
| +              | 64<br>(60.4%)         | 0                      | 42 | 106   |

(A)

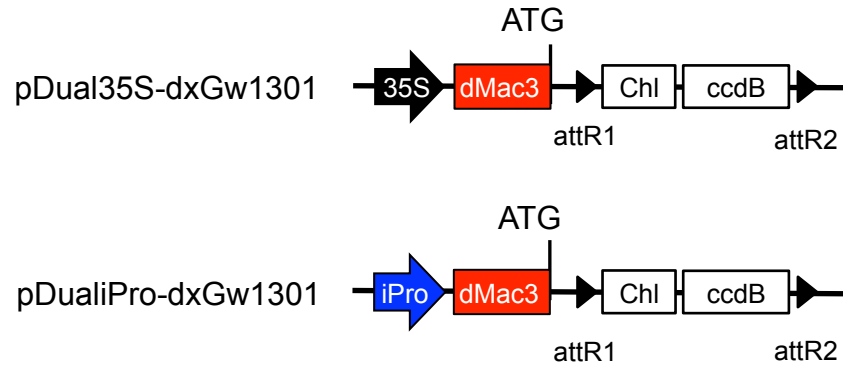

(B)

35S  
promoter

CATGGAGTCAAAGATTCAAATAGAGGACCTAACAGAACTCG  
CCGTAAAGACTGGCGAACAGTTCATACAGAGTCTCTTACGA  
CTCAATGACAAGAAGAAAATCTTCGTCAACATGGTGGAGCA  
CGACACACTTGTCTACTCCAAAAATATCAAAGATACAGTCT  
CAGAAGACCAAAGGGCAATTGAGACTTTTCAACAAAGGGTA  
ATATCCGGAAACCTCCTCGGATTCCATTGCCAGCTATCTG  
TCACTTTATTGTGAAGATAGTGGAAAAGGAAGGTGGCTCCT  
ACAAATGCCATCATTGCGATAAAGGAAAGGCCATCGTTGAA  
GATGCCTCTGCCGACAGTGGTCCCAAAGATGGACCCCACC  
CACGAGGAGCATCGTGGAAAAGAAGACGTTCCAACCACGT  
CTTCAAAGCAAGTGGATTGATGTGATATCTCCACTGACGTA  
AGGGATGACGCACAATCCCACTATCCTTCGCAAGACCCTTC  
CTCTATATAAGGAAGTTCATTTTCATTTGGAGAGAACACGGG  
GGACTCTTGACCTCTAGT **AAGACTAAAGAGAGCTTTTTCAT**  
**ACCAAAGAAGTACAACAAAAGATTTGCTCCTCATTTTCTGA**  
**ATCCTGGGACTCTCTAGCCTGTAGAAGAAGAAAGGCAGGAA**  
**TTTCAGCTCAAGAGAACAGATCACAATATTTACCCACGGCA**  
**CTGTCTCGCAAT** **ATG**AGATCTGGTCTAGAGTTATCAACAAG  
TTTGTACAAAAAAGCTGAACGAGAAACGTAAAATGATATAA  
ATATCAATATATTAAATTAGATTTTGCATAAAAAACAGACT  
ACATAATACTGTAAACACAACATATCCAGTCACTATGCAT

dMac3

attR1

initiation codon

(C)

iPromoter CATGCCGGTTCGACTCTAAAGGATCCGGGTGACAGCCCTCCG  
ACGGGTGACAGCCCTCCGACGGGTGACAGCCCTCCGAATTC  
AAGAGGATCCGGGTGACAGCCCTCCGACGGGTGACAGCCCT  
CCGACGGGTGACAGCCCTCCGAATTCGAGCTCGGTA<sup>T</sup>CCGG  
GGATCTGTCGACCTCGATCGAGATCTTCGCAAGACCCTTCC  
TCTATATAAGGAAGTTCATTTTCATTTGGAGAGGACACGCTG  
AAGCTAGTCGACTCTAGCATT<sup>T</sup>TAAAT<sup>AAGACTAAAGAGAGC</sup>  
TTTTTCATACCAAAGAAGTACAACAAAAGATTTGCTCCTCA  
TTTTCTGAATCCTGGGACTCTCTAGCCTGTAGAAGAAGAAA  
GGCAGGAATTTCAAGCTCAAGAGAACAGATCACAAATATTTAC  
CCACGGCACTGTCTCGCAAT<sup>ATG</sup>TGCGGACGTATTCTAGAG  
TTATCAACAAGTTTGTACAAAAAAGCTGAACGAGAAACGTA  
AAATGATATAAATATCAATATATTAAATTAGATTTTGCATA  
AAAAACAGACTACATAATACTGTAAAACACAACATATCCAG  
TCACTATGCAT

dMac3

attR1

initiation codon

Fig A. Details of pDual35S-dxGw1301 and pDualiPro-dxGw1301.

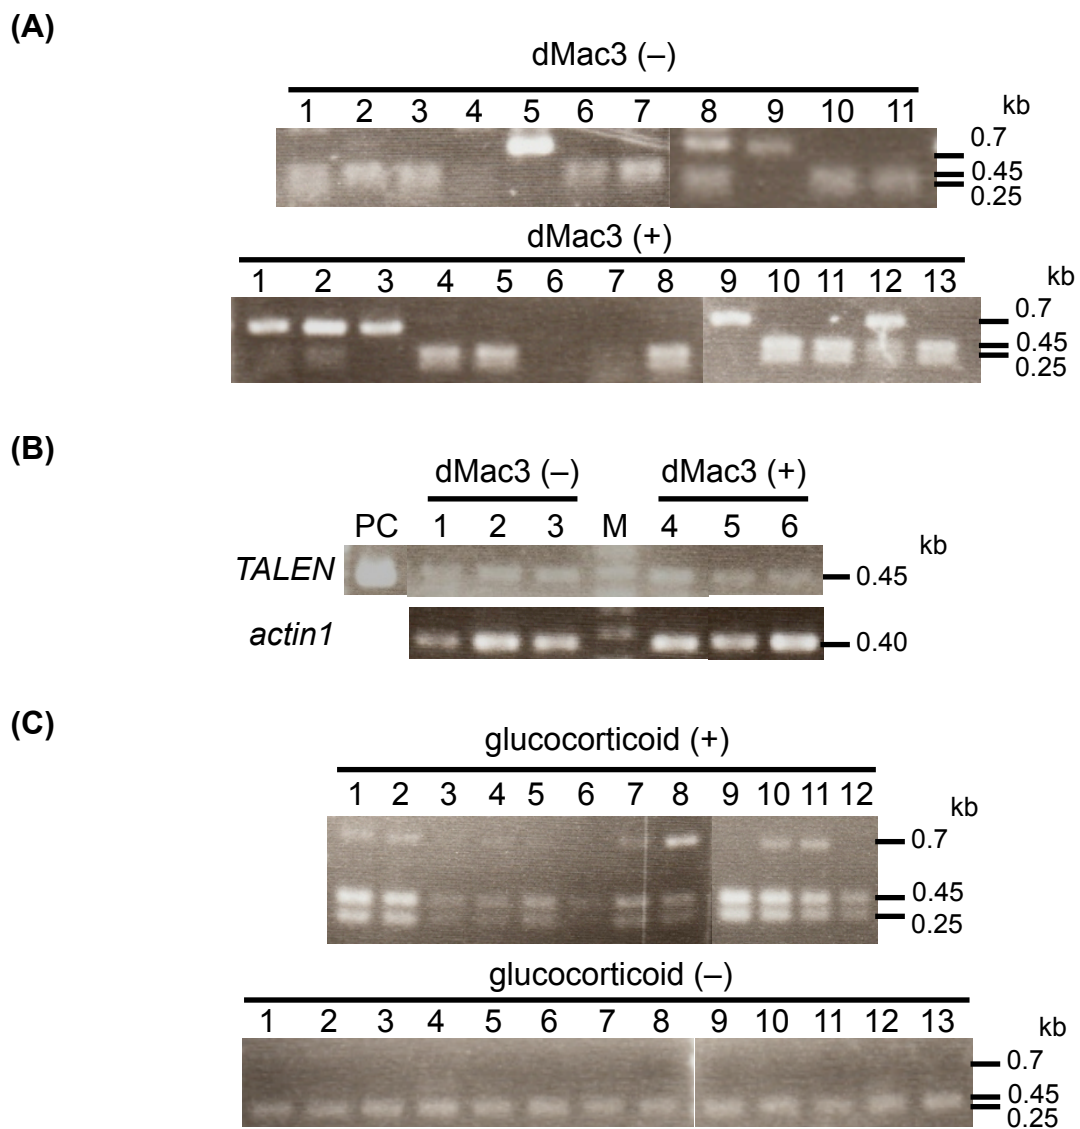

**Fig B. Detection of targeted mutation.**
